# Supplementary material
Source: PubMed Central journal article supplement (PMC7790509)

Extended Figure 3B

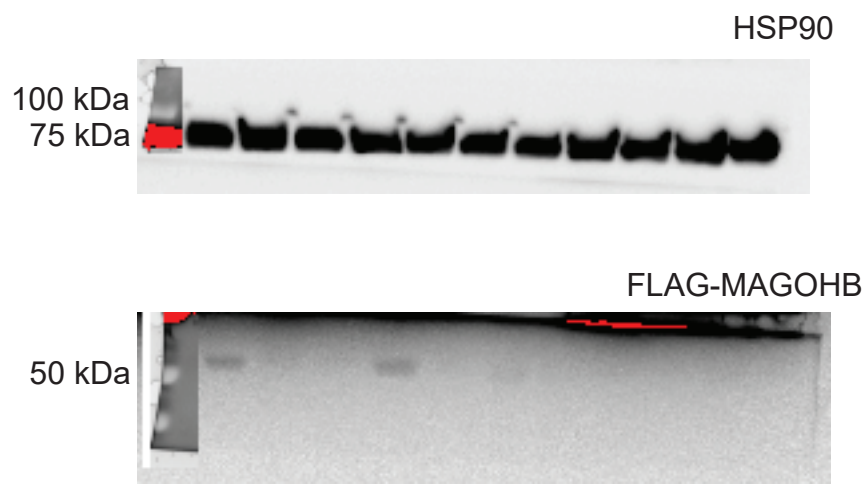

Supplement: NIHMS1600041-supplement-SourceDataFig3.pdf [file NIHMS1600041-supplement-SourceDataFig3.pdf]

Extended Figure 5B

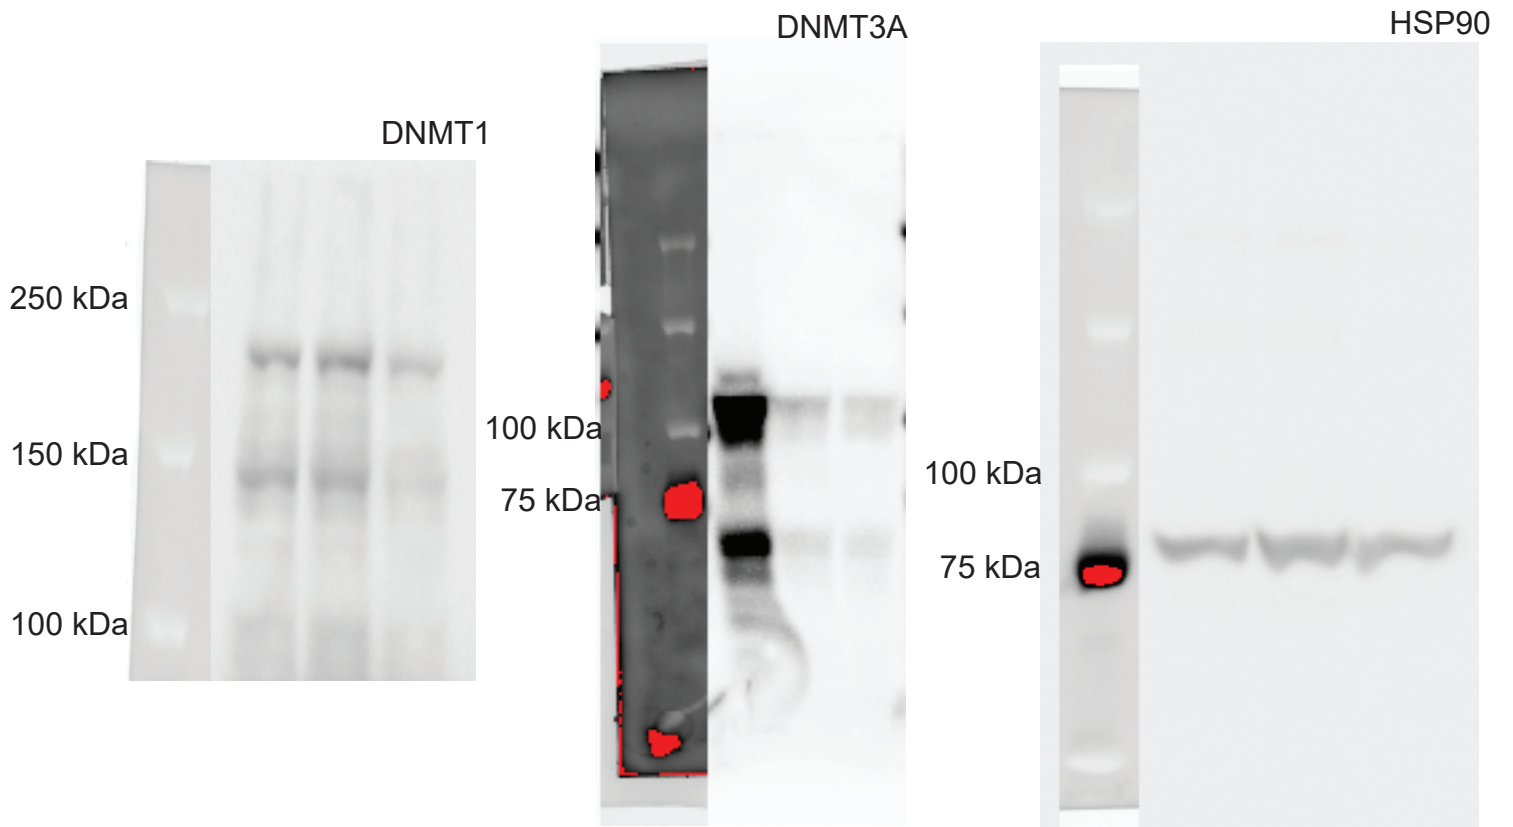

Extended Figure 5C

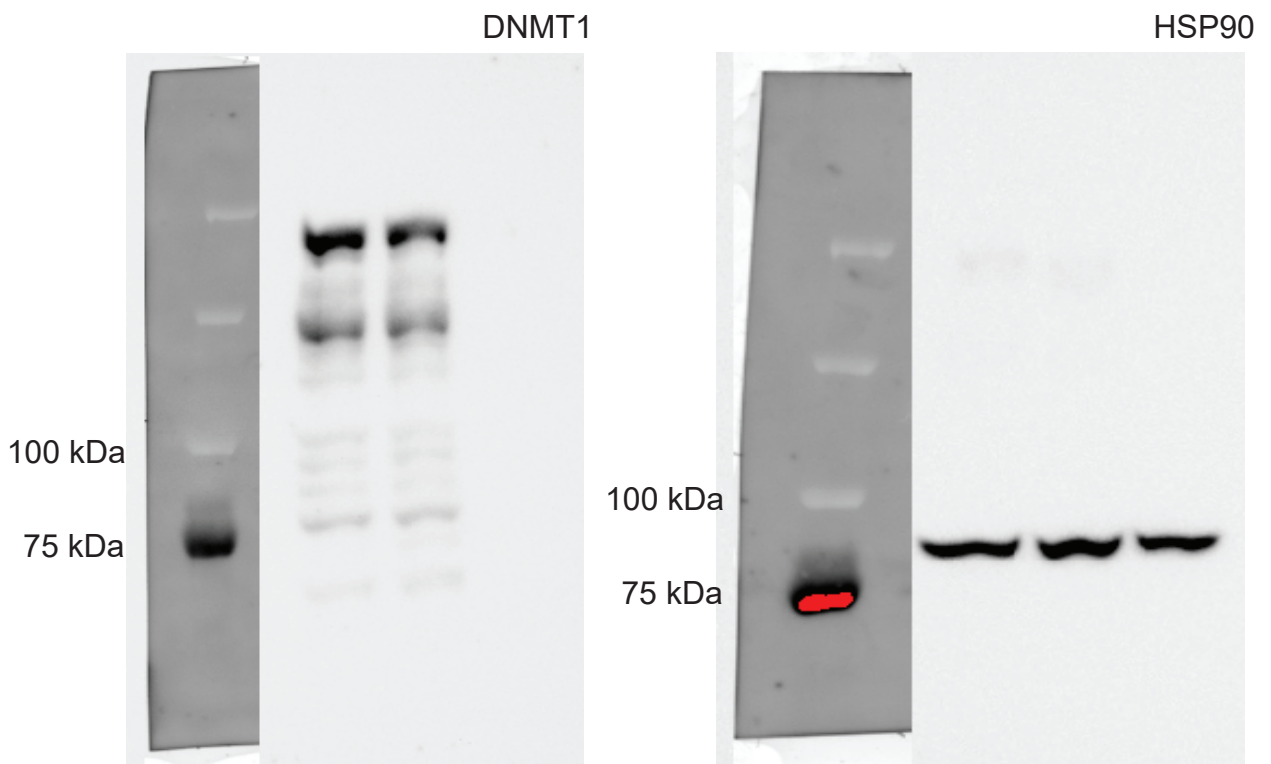

Supplement: NIHMS1600041-supplement-SourceDataFig5.pdf [file NIHMS1600041-supplement-SourceDataFig5.pdf]

Figure 6B

SUZ12

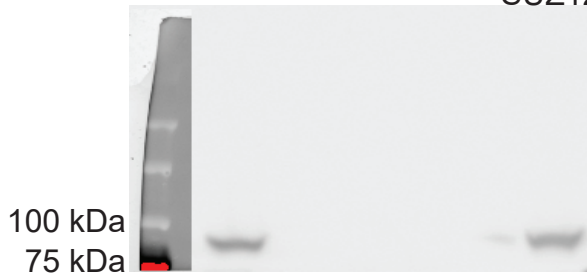

HSP90

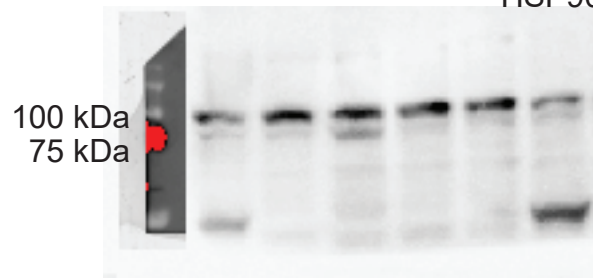

MLL2 CT

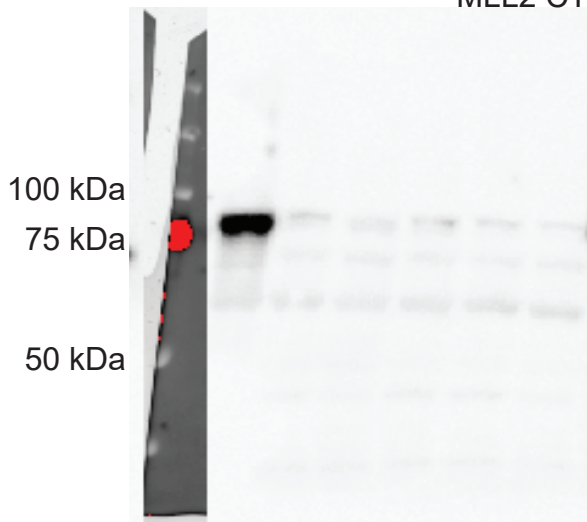

H3K27me3

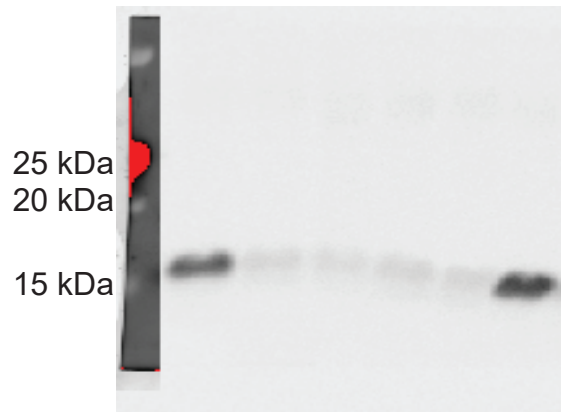

Supplement: NIHMS1600041-supplement-SourceDataFig6.pdf [file NIHMS1600041-supplement-SourceDataFig6.pdf]

Extended Figure 2B

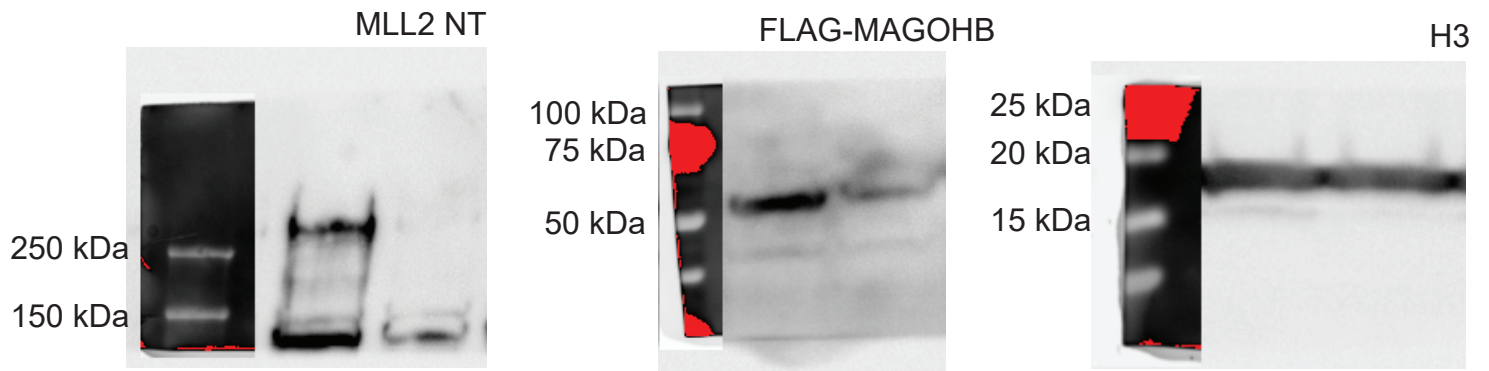

Extended Figure 2C

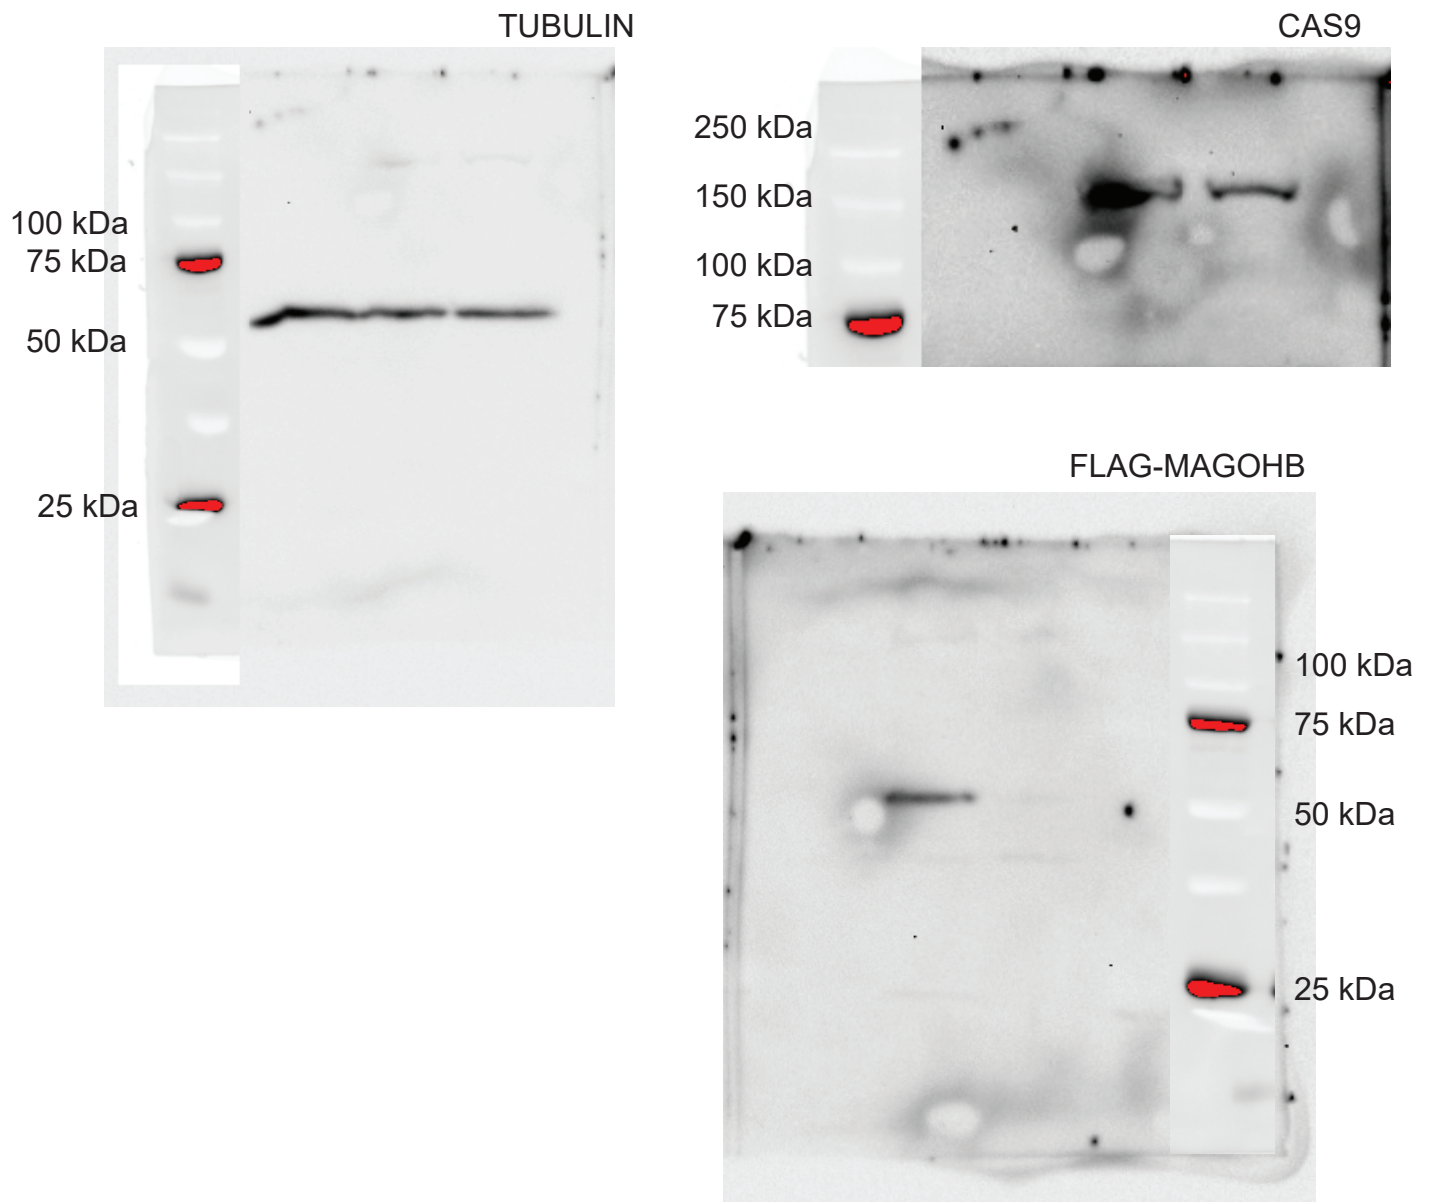

Supplement: NIHMS1600041-supplement-SourceDateFig2.pdf [file NIHMS1600041-supplement-SourceDateFig2.pdf]
